# Supplementary material
Source: ML conference proceedings conference paper supplement (https://openaccess.thecvf.com/content/ICCV2025/html/You_FB-Diff_Fourier_Basis-guided_ICCV_2025_paper.html)
Supplement: Supplementary file 1 [file You_FB-Diff_Fourier_Basis-guided_ICCV_2025_supplemental.pdf]

# FB-Diff: Fourier Basis-guided Diffusion for Temporal Interpolation of 4D Medical Imaging

## Supplementary Material

### 6. Dataset Settings

**ACDC.** The ACDC dataset contains 80% pathological cardiac cases, including pathologies with myocardial infarction, cardiomyopathy. All MRI volumes are resampled with a voxel space of  $1.5 \times 1.5 \times 3.12mm^3$ . Besides, all cardiac scans have been cropped with a centered patch. The patch size is set as  $128 \times 128 \times 32$ . The frame number  $N$  shows a range of  $[6, 16]$ . Min-max scaling at  $[0, 1]$  is applied to ensure consistent scaling across all scans.

**4D Lung.** In the case of the 4D-lung dataset, the models are trained to predict the four intermediate frames (10%, 20%, 30%, 40%) between the end-inspiratory (0%) and end-expiratory (50%) phases. Only CT images captured using kilovoltage energy are included in the study due to their superior image quality. The data preprocessing strategy is the same as that in [30].

### 7. Implementation Details

**Network Details.** For the first stage, the VAE is not to regulate the whole pipeline, but to utilize a MedNeXt [42] structure for encoding temporal features and learning Fourier bases. The VAE maps the image space into the downsampled latent space with a ratio of  $1/8$ . Specifically, the core component for MedNeXt is the MedNeXtBlock. For more details of the VAE, please refer to the source codes released [here](#). For the latent diffusion UNet, we select a more lightweight MedNeXt as the baseline, with the downsampling scale equal to  $1/4$ . The diffusion timestep is set as 1000.  $L_2$  norm is chosen as the loss function for the diffusion process.

**Training Details.** All models are trained using AdamW optimizer with the linear warm-up strategy. For the training of VAE, the initial learning rate is set as  $3e-4$  with a cosine learning rate decay scheduler, and weight decay is set as  $1e-5$ . While for the training of the diffusion model, the learning rate is set as  $1e-4$ . The batch size is set as 2. Experiments are implemented based on Pytorch and 2 NVIDIA RTX 4090 GPUs.

### 8. Model Efficiency

We have added the model efficiency metrics. Table 5 reports the training time, FLOPs, and per-case inference speed for models. Overall, FB-Diff offers a good trade-off in performance and model efficiency.

Table 5. (a) Generalization on cardiac ultrasound in EchoNet-Dynamic [40]. (b) Model efficiency on training time, computational costs, and per-case inference speed.

| Model                 | (a) Cardiac ultrasound |                    |                  | (b) Model efficiency |           |               |
|-----------------------|------------------------|--------------------|------------------|----------------------|-----------|---------------|
|                       | PSNR (dB) $\uparrow$   | LPIPS $\downarrow$ | FVD $\downarrow$ | Training time (h)    | FLOPs (T) | Inference (s) |
| Voxelmorph [2]        | 28.40                  | 2.492              | 295.3            | 5.6                  | 0.49      | 1.09          |
| IFRNet [31]           | 29.95                  | 2.017              | 261.8            | 21.3                 | 1.92      | 1.27          |
| UVI-Net [30]          | <b>30.87</b>           | <b>1.818</b>       | <b>243.7</b>     | 18.5                 | 1.27      | 0.63          |
| Conditional diff [16] | 26.67                  | 2.578              | 337.2            | 12.4                 | 2.37      | 37.80         |
| FB-Diff               | <u>30.51</u>           | <b>1.654</b>       | <b>227.0</b>     | 18.0                 | 1.58      | 29.50         |

### 9. Generalization to other modalities

We tested FB-Diff on a different imaging modality to confirm generality. Using the cardiac ultrasound dataset proposed by [40], FB-Diff achieves comparable or better performance than benchmark methods. As revealed in Table 5, FB-Diff achieves better temporal consistency for interpolated videos while maintaining promising reconstruction metrics.

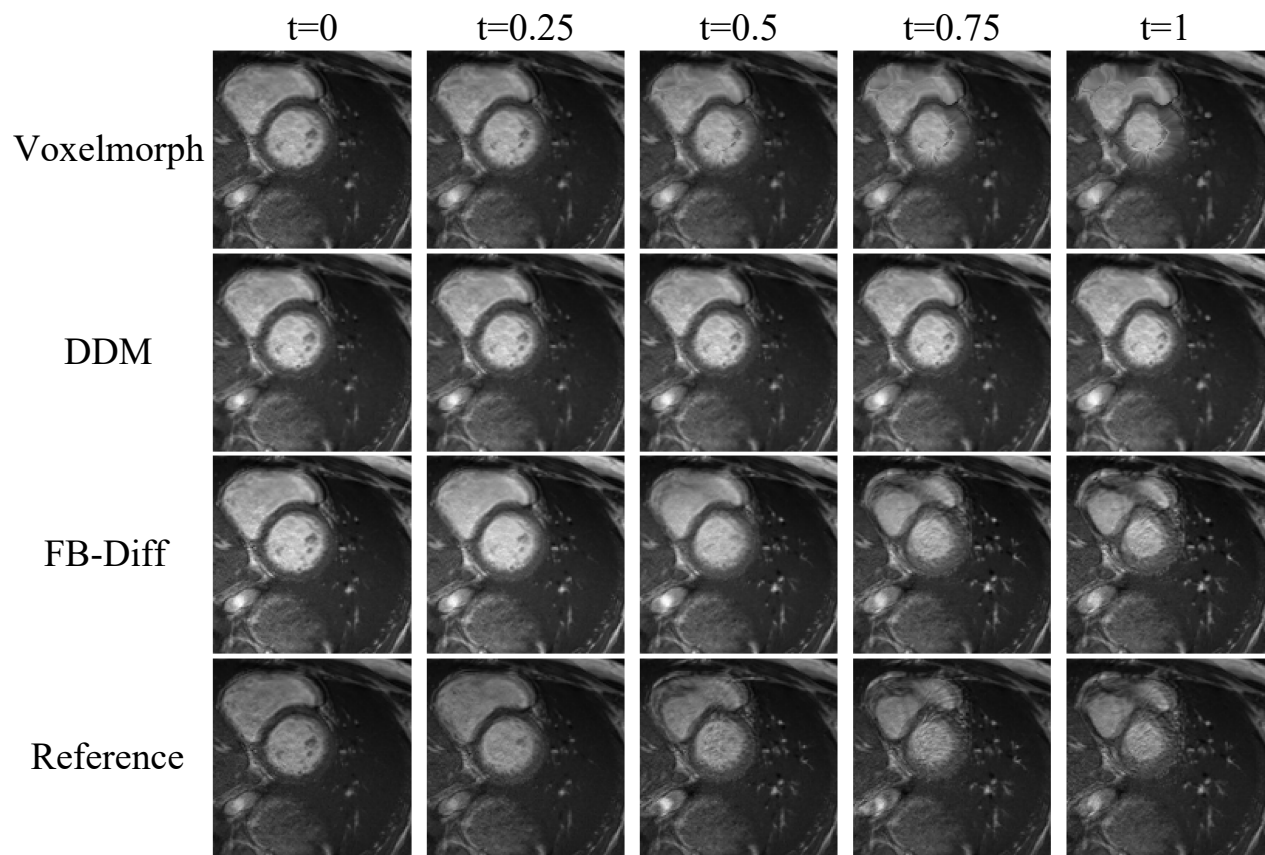

Figure 8. Temporal variation comparison between FB-Diff and existing methods with the linear motion hypothesis.

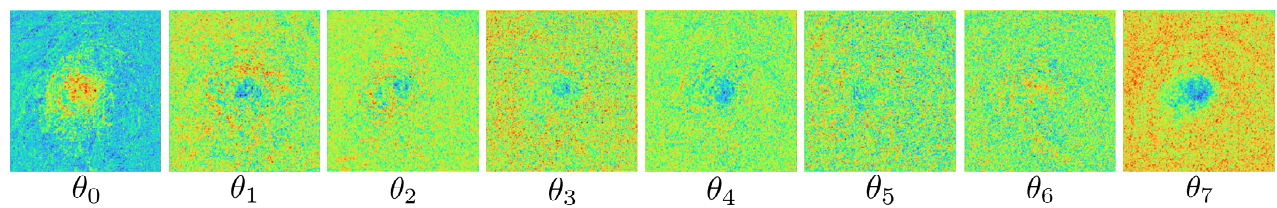

Figure 9. The spectral intensity visualizations of the first eight well-learned physiology motion priors on ACDC.
